# Supplementary material
Source: HighWire-hosted journal article supplement (https://advances.sciencemag.org/content/suppl/2017/02/28/3.3.e1602417)
Supplement: 1602417_SM.pdf [file 1602417_SM.pdf]

## Supplementary Materials for **Sequential self-folding of polymer sheets**

Ying Liu, Brandi Shaw, Michael D. Dickey, Jan Genzer

Published 3 March 2017, *Sci. Adv.* **3**, e1602417 (2017)

DOI: 10.1126/sciadv.1602417

### **The PDF file includes:**

- fig. S1. Optical absorption spectra of color inks printed on a plain prestrained polymer sheet.
- fig. S2. Thickness of hinges printed with different colors using an HP Color LaserJet CP3525dn printer on Grafix polymer sheets.
- table S1. Measured power density for different LEDs used for the folding test.
- table S2. CMYK codes for different colors.
- Legends for videos S1 and S2

### **Other Supplementary Material for this manuscript includes the following:**

(available at [advances.sciencemag.org/cgi/content/full/3/2/e1602417/DC1](http://advances.sciencemag.org/cgi/content/full/3/2/e1602417/DC1))

- video S1 (.mp4 format). Sequential self-folding of three star-shaped templates placed on top of each other using a blue LED.
- video S2 (.mp4 format). Sequential self-folding of a template featuring double hinges with different colors on the three panels to fold up to 180°.

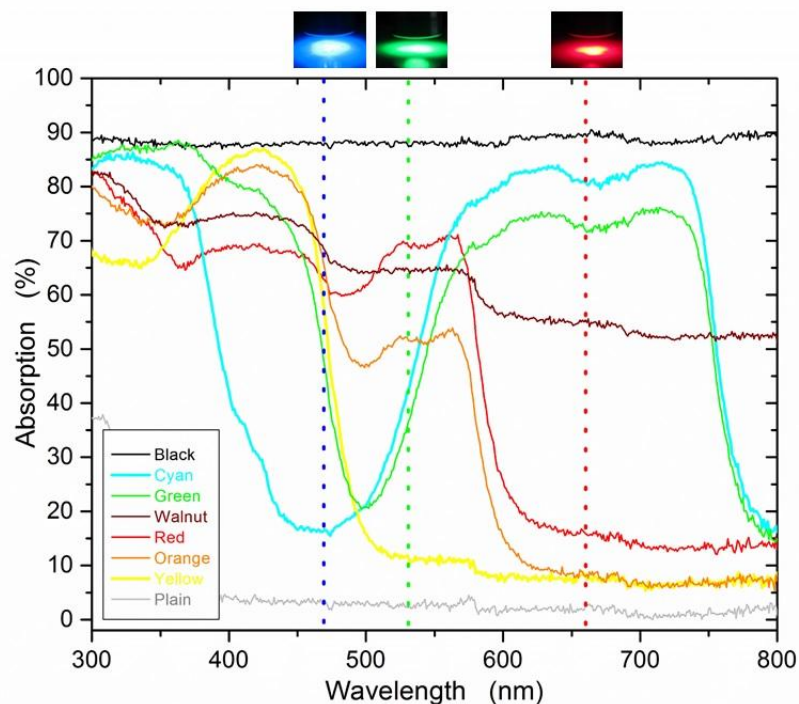

**fig. S1. Optical absorption spectra of color inks printed on a plain prestrained polymer sheet.** The dashed vertical lines represent the typical wavelengths for blue (470 nm), green (530 nm) and red (660 nm) LEDs.

**table S1. Measured power density for different LEDs used for the folding test.**

| Color | Wavelength (μm) | Nominal power of LED (W) | Distance to sample (cm) | Power density (mW/cm <sup>2</sup> ) |
|-------|-----------------|--------------------------|-------------------------|-------------------------------------|
| Red   | 660             | 15                       | 1.0                     | 580                                 |
|       |                 |                          | 1.5                     | 519                                 |
|       |                 |                          | 3.0                     | 362                                 |
| Green | 530             | 15                       | 1.0                     | 318                                 |
|       |                 |                          | 1.5                     | 285                                 |
|       |                 |                          | 3.0                     | 181                                 |
| Blue  | 470             | 15                       | 1.0                     | 727                                 |
|       |                 |                          | 1.5                     | 636                                 |
|       |                 |                          | 3.0                     | 373                                 |
| Red   | 630             | 50                       | 1.0                     | 916                                 |
|       |                 |                          | 1.5                     | 602                                 |
|       |                 |                          | 2.0                     | 513                                 |
| Blue  | 470             | 50                       | 3.0                     | 261                                 |
|       |                 |                          | 1.0                     | 1541                                |
|       |                 |                          | 1.5                     | 1238                                |
| Blue  | 470             | 50                       | 2.0                     | 743                                 |
|       |                 |                          | 3.0                     | 421                                 |

**table S2. CMYK codes for different colors.**

| <b>Color</b> | <b>C</b> | <b>M</b> | <b>Y</b> | <b>K</b> |
|--------------|----------|----------|----------|----------|
| Black        | 0        | 0        | 0        | 100      |
| Yellow       | 0        | 0        | 100      | 0        |
| Walnut       | 0        | 20       | 40       | 60       |
| Orange       | 0        | 60       | 100      | 0        |
| Red          | 0        | 100      | 100      | 0        |
| Magenta      | 0        | 100      | 0        | 0        |
| Green        | 100      | 0        | 100      | 0        |
| Cyan         | 100      | 0        | 0        | 0        |
| Blue         | 100      | 100      | 0        | 0        |

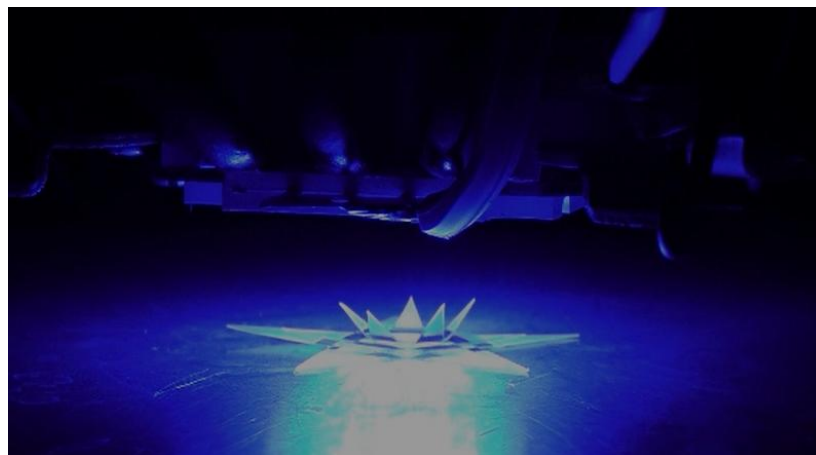

**video S1. Sequential self-folding of three star-shaped templates placed on top of each other using a blue LED.** The video plays at 2X speed. See video in the Supporting Information.

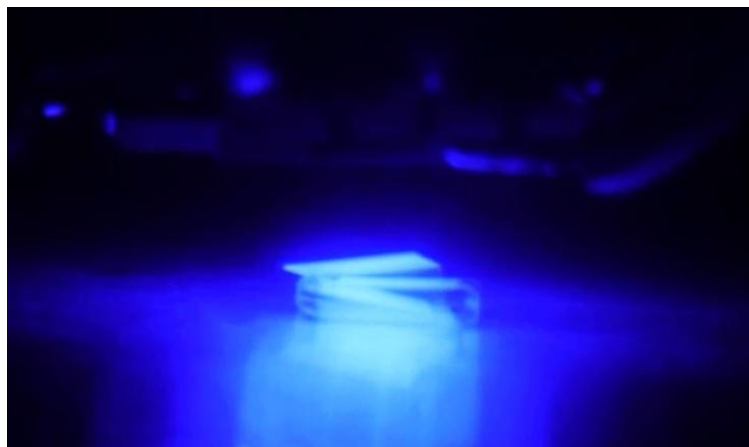

**video S2. Sequential self-folding of a template featuring double hinges with different colors on the three panels to fold up to 180°.** The video plays at 4X speed. See video in the Supporting Information.

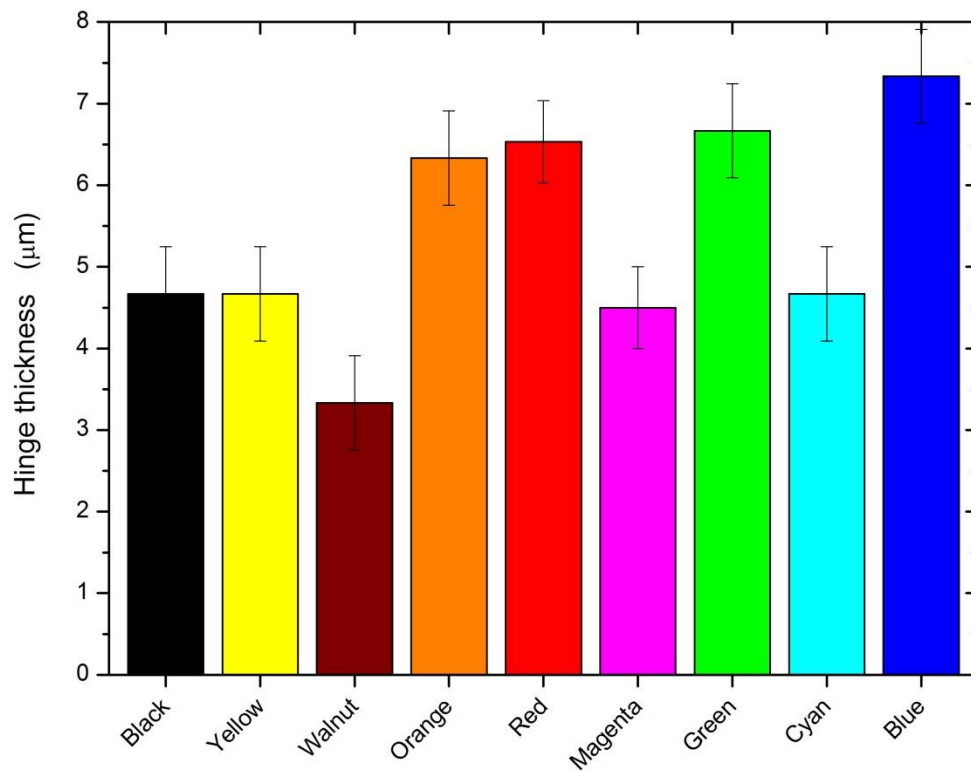

**fig. S2. Thickness of hinges printed with different colors using an HP Color LaserJet CP3525dn printer on Grafix polymer sheets.** The error bars correspond to the standard deviation obtained from three measurements on the same sample.
